# Supplementary material
Source: Springer Nature journal article supplement (https://www.springermedizin.de/resource/supplementary/12933_2004_25_MOESM5_ESM.pdf/9539438)

# Media

## Internal Elastic Lamina

Intimal Space

Disruption of IEL

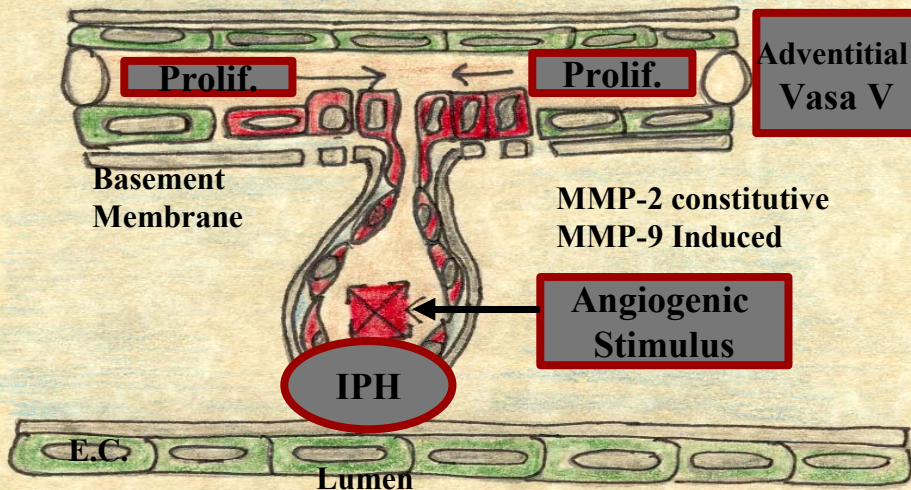

Supplement: MOESM5 [file 9539438]
